# Supplementary material for: Anti-carcinoembryonic Antigen Single-chain Variable Fragment Antibody Variants Bind Mouse and Human Neonatal Fc Receptor with Different Affinities That Reveal Distinct Cross-species Differences in Serum Half-life
Source: PubMed Central journal article supplement — J Biol Chem. 2012 May 8;287(27):22927–37. doi: 10.1074/jbc.M112.355131 (PMC3391105; doi:10.1074/jbc.m112.355131), 2012-05-08
Supplement: supp_M112.355131_jbc.M112.355131-1.pdf [file supp_M112.355131_jbc.M112.355131-1.pdf]

## SUPPLEMENTAL DATA

**SUPPLEMENTAL TABLE 1. SPR Req binding responses of chimeric anti-CEA scFv-Fc variants to immobilized mFcRn.**

| <b>Fragment</b>    | <b>Req (mFcRn)<br/>110 RU<sup>a</sup></b> | <b>Req (mFcRn)<br/>900 RU<sup>a</sup></b> | <b>Average relative binding<sup>b</sup></b> |
|--------------------|-------------------------------------------|-------------------------------------------|---------------------------------------------|
| <b>WT</b>          | 54                                        | 212.8                                     | 1.0                                         |
| <b>H435R</b>       | 57.1                                      | 236.8                                     | 1.09                                        |
| <b>H435Q</b>       | 16.9                                      | 73.4                                      | 0.33                                        |
| <b>I253A</b>       | 5                                         | 34.3                                      | 0.13                                        |
| <b>H310A</b>       | 2.3                                       | 11.7                                      | 0.05                                        |
| <b>H310A/H435Q</b> | NB <sup>c</sup>                           | 2.1                                       | 0.01 <sup>d</sup>                           |

<sup>a</sup> Resonance unit (RU) responses of duplicate injections of the scFv-Fc variants over levels of immobilized recombinant soluble mFcRn at two densities.

<sup>b</sup> Relative binding based on the equilibrium binding response (Req) average from two different immobilized densities of mFcRn.

<sup>c</sup> No binding, (NB).

<sup>d</sup> High density surface only.

**SUPPLEMENTAL TABLE 2. SPR Req binding responses of chimeric anti-CEA scFv-Fc variants to immobilized hFcRn.**

| <b>Fragment</b>    | <b>Req (hFcRn)<br/>320 RU<sup>a</sup></b> | <b>Req (hFcRn)<br/>1200 RU<sup>a</sup></b> | <b>Average relative binding<sup>b</sup></b> |
|--------------------|-------------------------------------------|--------------------------------------------|---------------------------------------------|
| <b>WT</b>          | 105                                       | 244.1                                      | 1.0                                         |
| <b>H435R</b>       | 110                                       | 306.6                                      | 1.15                                        |
| <b>H435Q</b>       | NB <sup>c</sup>                           | NB                                         | -                                           |
| <b>I253A</b>       | NB                                        | 9.1                                        | 0.04 <sup>d</sup>                           |
| <b>H310A</b>       | NB                                        | NB                                         | -                                           |
| <b>H310A/H435Q</b> | NB                                        | NB                                         | -                                           |

<sup>a</sup> Resonance unit (RU) responses of duplicate injections of the scFv-Fc variants over immobilized recombinant soluble hFcRn at two densities.

<sup>b</sup> Relative binding based on the equilibrium signal level (Req) average from two different immobilized densities of hFcRn.

<sup>c</sup> No binding (NB).

<sup>d</sup> High density surface only.

**SUPPLEMENTAL TABLE 3. Statistics (2-way ANOVA analysis) of the blood activity curves of <sup>123</sup>I-labeled scFv-Fc fragments in human FcRn transgenic mice.**

| <b>WT Balb/c</b>   | <b>hFcRnTg</b>     | <b>P value</b> | <b>Significance<br/>&lt;0.01 (99%)</b> |
|--------------------|--------------------|----------------|----------------------------------------|
| <b>WT</b>          | <b>WT</b>          | 0,0068         | YES                                    |
| <b>H435R</b>       | <b>H435R</b>       | < 0.0001       | YES                                    |
| <b>H435Q</b>       | <b>H435Q</b>       | < 0.0001       | YES                                    |
| <b>I253A</b>       | <b>I253A</b>       | 0,0004         | YES                                    |
| <b>H310A</b>       | <b>H310A</b>       | 0,0038         | YES                                    |
| <b>H310A/H435Q</b> | <b>H310A/H435Q</b> | 0,051          | NO                                     |

```

hFcRn      MGVPRPQFWALGLLLFLPGLGAESHLSLLYHLTAVSSPAPGTPAFWVSGWLGPPQYLS 60
mFcRn      MGMP--LPWALSLLLVLQPWTWGSETRPPLMYHLTAVSNPSTGLPSFWATGWLGPQQYLT 58
          **.*  ****.***.*** : *:*: .*.*****.*.* **.*.*****:
          .

hFcRn      YNSLRGEAEPCGAWVWENQVSWYWEKETDRLRIKEKLFLEAFKALG--GKGPYTLQGLLG 118
mFcRn      YNSLRQEADPCGAWMWENQVSWYWEKETDRLKSKEQLFLEALKTLEKILNGTYTLQGLLG 118
          *****.*:*****.*****.*****.*:*****.*:* :.*.*****

hFcRn      CELGPDNTSVPTAKFALNGEEFMNFDLKQGTWGGDWPEALAIQRWQQDKAANKELTFL 178
mFcRn      CELASDNSSVPTAVFALNGEEFMKFNPRIGNWTGEWPETEIVANLWMKQPDAAARKESEFL 178
          ***.*.*:***** *****.*:* : *.* *:***: ::* * :* .*** **

hFcRn      LFSCPHRLREHLERGRGNLEWKPEPPSMRLKARPSSPGFVLTCSAFSFPPELQLRFLRN 238
mFcRn      LNSCPERRLLGHLERGRNLEWKPEPPSMRLKARPGNSGSSVLTCAAFFSFPPELKFRLRN 238
          * ***.* ** ***** *****.*.* * *****.*:*****.*:*****

hFcRn      GLAAGTQGDFGPNSDGSFHASSLTVKSGDEHHYCCIVQHAGLAQPLRVELESPAKSSV 298
mFcRn      GLASGNCSTGPNSDGSFHAWSLLEVKRGDEHHYQCQVEHEGLAQPLTVDLDSARSSV 298
          ***.*:*.* . ***.****** * * * ***** * *.* ***** *:*.*:*:**

hFcRn      LVVGIVIGVLLLTAAGVGGALLWRRMRSGLPAPWISLRGDDTGVLPTPGEAQDADLKD 358
mFcRn      PVVGIVLGLLLVVVAIAGGVLLWGRMRSGLPAPWLSLSGDDSGDLLPGGNLPPEAEPPQGA 358
          *****.*:*:*.* .**.*** *****.*:** **.* * ** . . :*:* :..

hFcRn      NVIPATA 365
mFcRn      NAFPATS 365
          *.*:**:

```

**SUPPLEMENTAL FIGURE 1.** CLUSTAL multiple amino acid alignment of mouse and human FcRn HC. Amino acids E115, E116 and W131 are highlighted in red (human numbering). Alignment score: 66%.

# A.

```

hIgG1 -----EPKSCDKTHTCPP 13
hIgG3 ELKTPLGDTTHTCPRCEPKSCDTPPCCPRCEPKSCDTPPCCPRCEPKSCDTPPCCPR 60
hIgG2 -----ERKCC--VECPP 10
hIgG4 -----ESKYG--PPCPS 10
                * * **

hIgG1 CPAPELLGGPSVFLFPPKPKDTLMISRTPEVTCVVVDVSHEDPEVQFNWYVDGVEVHNAK 73
hIgG3 CPAPELLGGPSVFLFPPKPKDTLMISRTPEVTCVVVDVSHEDPEVQFNWYVDGVEVHNAK 120
hIgG2 CPAPPVAG-PSVFLFPPKPKDTLMISRTPEVTCVVVDVSHEDPEVQFNWYVDGVEVHNAK 69
hIgG4 CPAPEFLGGPSVFLFPPKPKDTLMISRTPEVTCVVVDVQEDPEVQFNWYVDGVEVHNAK 70
      **** . * *****:*****:*****:*.*****

hIgG1 TKPREEQYNSTYRVVSVLTVLHQDWLNGKEYKCKVSNKALPAPIEKTISKAKGQPREPQV 133
hIgG3 TKLREEQYNSTFRVSVLTVLHQDWLNGKEYKCKVSNKALPAPIEKTISKAKGQPREPQV 180
hIgG2 TKPREEQFNSTFRVSVLTVVHQDWLNGKEYKCKVSNKGLPAPIEKTISKTKGQPREPQV 129
hIgG4 TKPREEQFNSTYRVVSVLTVLHQDWLNGKEYKCKVSNKGLPSSIEKTISKAKGQPREPQV 130
      ** ****:***:*****:*****:*****:*.*:*****:*****

hIgG1 YTLPPSREEMTKNQVSLTCLVKGFYPSDIAVEWESNGQPENNYKTTPPVLDSDGSFFLYS 193
hIgG3 YTLPPSREEMTKNQVSLTCLVKGFYPSDIAVEWESNGQPENNYNTPPMLDSDGSFFLYS 240
hIgG2 YTLPPSREEMTKNQVSLTCLVKGFYPSDIAVEWESNGQPENNYKTTPPMLDSDGSFFLYS 189
hIgG4 YTLPPSQEEMTKNQVSLTCLVKGFYPSDIAVEWESNGQPENNYKTTPPVLDSDGSFFLYS 190
      *****:*****:*****:*****:*****:*****:*****

hIgG1 KLTVDKSRWQQGNVFSCSVMHEALHNHYTQKSLSLSPGK 232
hIgG3 KLTVDKSRWQQGNIFSCSVMHEALHNRYTQKSLSLSPGK 279
hIgG2 KLTVDKSRWQQGNVFSCSVMHEALHNHYTQKSLSLSPGK 228
hIgG4 RLTVDKSRWQEGNVFSCSVMHEALHNHYTQKSLSLSPGK 229
      :*****:***:*****:*****:***** **

```

# B.

```

mIgG1 ---VP--RDCGCKPC---ICTVPEVS---SVFIFPPKPKDVLTITLTPKVTCVVVDISK 48
mIgG3 EPRIP--KPSTPPGS---SCPGNILGGPSVFIFPPKPKDALMISLTPKVTCVVVDVSE 54
mIgG2a EPRGP--TIKCPPPC---KCPAPNLGGPSVFIFPPKIKDVLMISLSPIVTCVVVDVSE 54
mIgG2b EPSGPISTINCPPKCEHKCPAPNLGGPSVFIFPPNIKDVLMISLTPKVTCVVVDVSE 60
      * . *.: *****: **.* *:.* *****:*.

mIgG1 DDPEVQFSWFVDDVEVHTAQTQPREEQFNSTFRSVSELPIMHQDWLNGKEFKCRVNSAAF 108
mIgG3 DDPDVHVSWFVNDKEVHTAWTQPREAQYNSTFRVVSALPIQHQDWMRGKEFKCKVNNKAL 114
mIgG2a DDPDVQISWFVNNVEVHTAQTQTHREDYNSTLRVVSALPIQHQDWMSGKEFKCKVNNKDL 114
mIgG2b DDPDVQISWFVNNVEVHTAQTQTHREDYNSTIRVVSTLPIQHQDWMSGKEFKCKVNNKDL 120
      ***:*.*****: ***** **.: :***:* ** *** *****: *****:*.

mIgG1 PAPIEKTISKTKGRKAPQVYTIPPPKEQMAKDKVSLTCMITDFFPEDITVEWQWNGQPA 168
mIgG3 PAPIERTISKPKGRAQTPQVYTIPPPREQMSKKVSLTCLVTNFFSEAISVEWERNGELE 174
mIgG2a PAPIERTISKPKGSVRAPQVYVLPPPEEEMTKQVTLCMVTDFMPEDIYVEWTNNGKTE 174
mIgG2b PSPIERTISKIKLVRAPQVYILPPPAEQLSRKDVSLTCLVVGFNPGDISVEWTSNGHTE 180
      *:***:***** ** :**** :*** *::::..*:*****:..* . * *** **

mIgG1 ENYKNTQPIMDTDGSYFVYSKLNVQSNWEAGNTFTCSVLHEGLHNHHTEKSLSHSPGK 227
mIgG3 QDYKNTPPILDSDGTYFLYSKLTVDTDSWLQEIFTCSVVHEALHNHHTQKNLSRSPGK 233
mIgG2a LNYKNTEPVLDSDGSYFMYSKLRVEKNWVERNSYSCSVVHEALHNHHTTKSFSRTPGK 233
mIgG2b ENYKDTAPVLDSDGSYFISKLNMKTSKWEKTDSFSCNVRHEGLKNYLKKTISRSPGK 239
      :**:* *:.*:***:***:***** :...* : :*. * **.*:***: *.:***:***

```

**SUPPLEMENTAL FIGURE 2.** CLUSTAL multiple amino acid alignment of mouse and human IgG Fc C<sub>H</sub>2-C<sub>H</sub>3. Amino acid sequences corresponding to the hinge region are highlighted in bold and red while sequence areas involved in binding to classical Fcγ receptors are shown in bold

black. The three key amino acid residues involved in binding to FcRn, I253, H310 and H435 are highlighted in bold green.

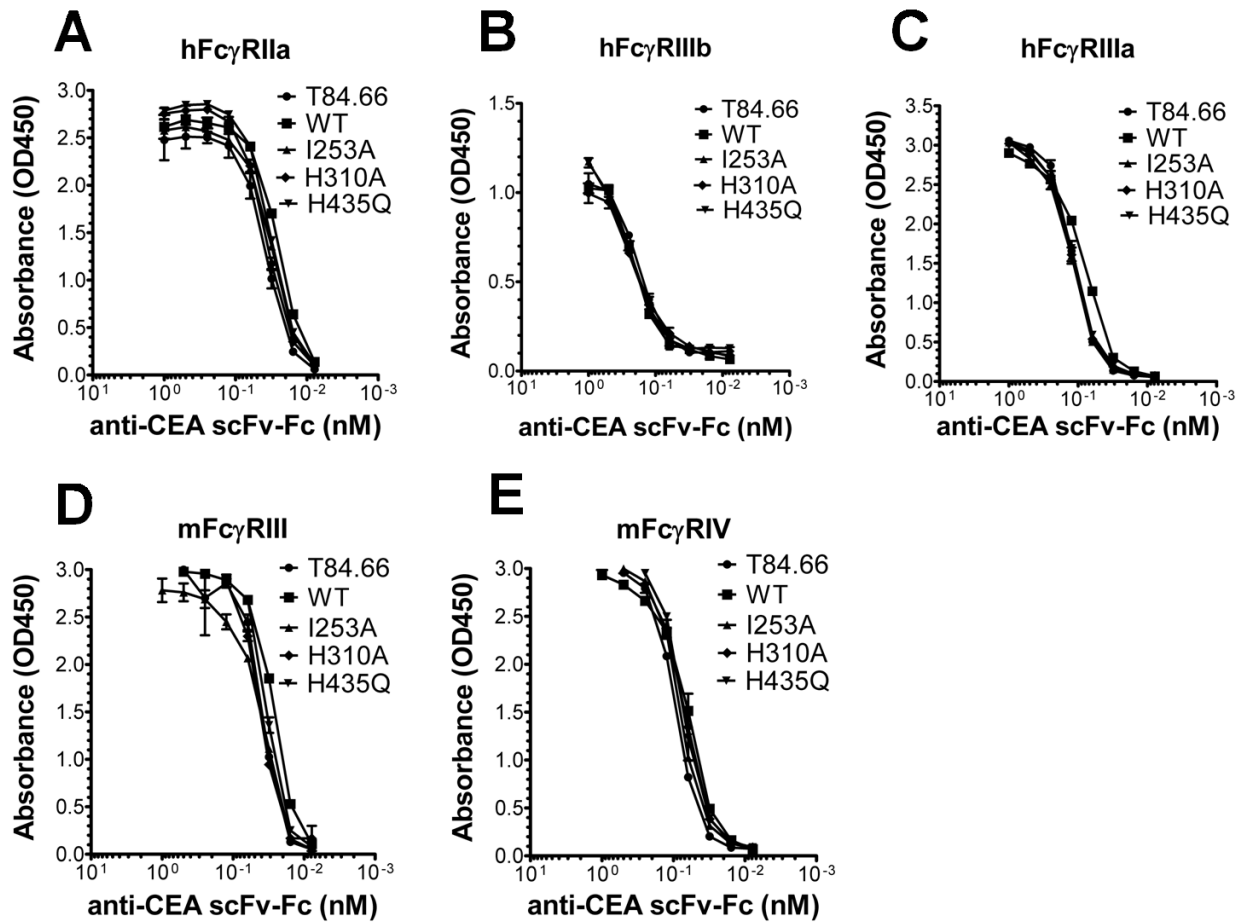

**SUPPLEMENTAL FIGURE 3.** ELISA measurements of FcγR binding to scFv-Fc variants. Binding of (A) hFcγRIIa, (B) mFcγRIIIb, (C) hFcγRIIIa, (D) mFcγRIII and mFcγRIV to titrated amounts of T84.66 and the scFv-Fc variants (WT, I253A, H310A and H435Q). The numbers given represent the mean of triplicates.

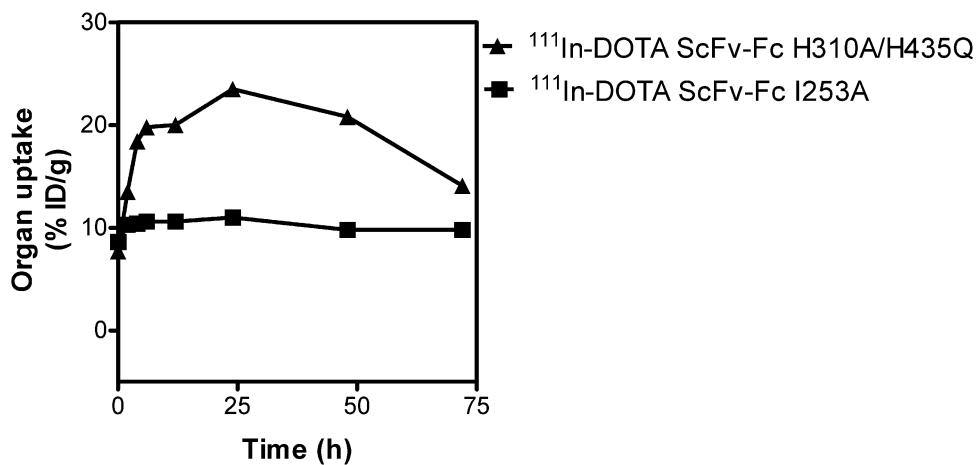

**SUPPLEMENTAL FIGURE 4. (B)** Liver accumulation in LS174T xenografted athymic nude mice of  $^{111}\text{In}$ -DOTA labeled anti-CEA scFv-Fc H310A/H435Q and I253A post injection. Liver uptake is expressed as percent injected dose per gram (% ID/g). The Figures were constructed using the biodistribution data previously reported (36).
